# Supplementary material for: Freestanding composite electrodes of MnOxembedded carbon nanofibers for high-performance supercapacitors
Source: Royal Society of Chemistry journal article supplement (doi:10.1039/c4ra06301e), 2014-08-14
Supplement: c4ra06301e1.pdf [file c4ra06301e1.pdf]

## Supporting Information

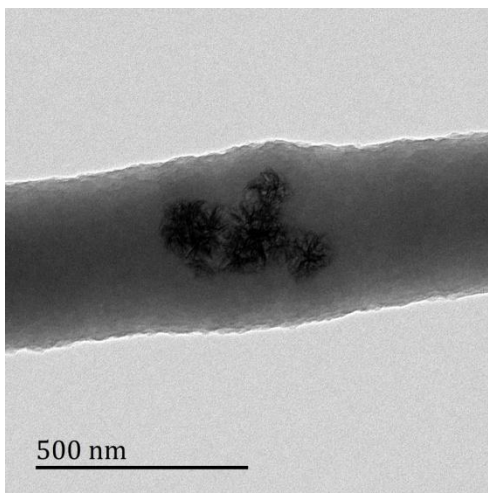

Figure S1. TEM image of  $\text{MnO}_2$  in Mn/C-1 nanofibers with a high magnification.

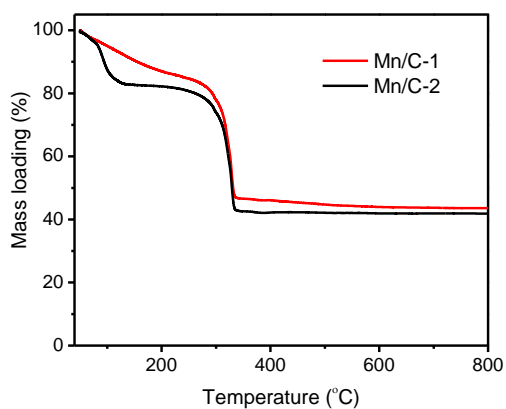

Figure S2. The TGA curves of Mn/C-1 and Mn/C-2.

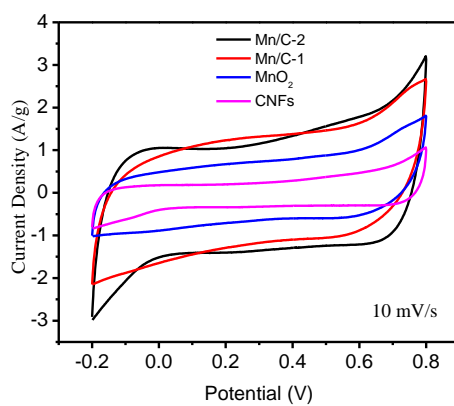

Figure. S3. CV curves at 10 mV/s for pure CNFs,  $\text{MnO}_x$ , Mn/C-1 and Mn/C-2

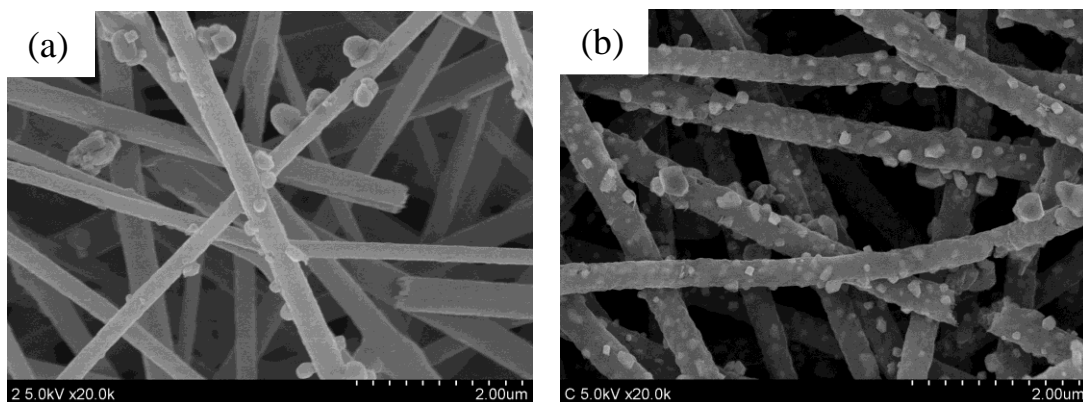

Figure. S4 SEM images of (a) Mn/C-1 and (b) Mn/C-2 tested at 1 A/g after 2000 cycles

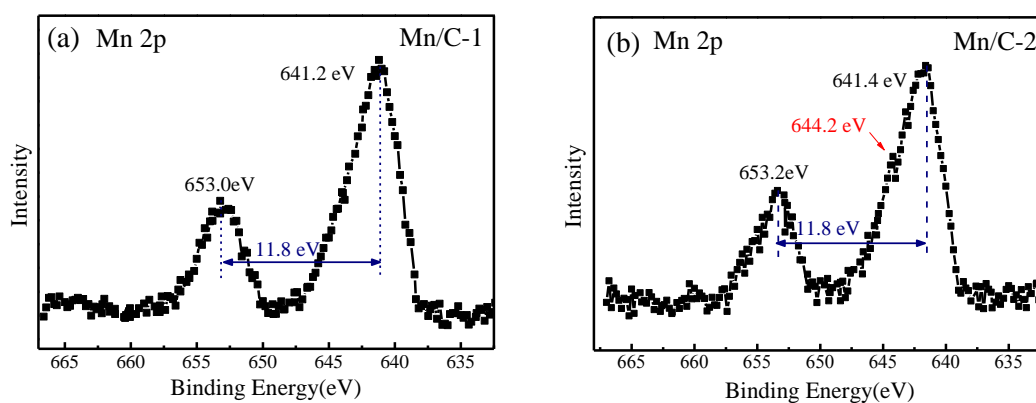

Figure. S5. XPS Mn 2p spectrum of Mn/C-1 and Mn/C-2 tested at 1 A/g after 2000 cycles

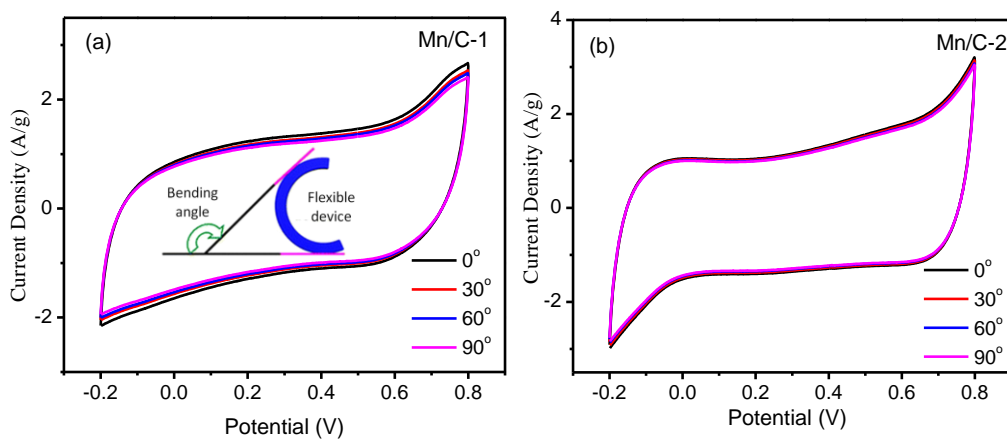

Figure S6. CV curves of (a) Mn/C-1 and (b) Mn/C-2 tested at various bending angles.
